# Supplementary material for: Measuring fidelity to manualised peer support for people with severe mental health conditions: development and psychometric evaluation of the UPSIDES fidelity scale
Source: PubMed Central journal article supplement (PMC11468091; doi:10.1186/s12888-024-06081-8), 2024-10-11
Supplement: 12888_2024_6081_MOESM2_ESM.pdf [file 12888_2024_6081_MOESM2_ESM.pdf]

## Appendix B – Final UPSIDES fidelity scale

### UFS-S (service user version) - English

|                                                                                                                              | Not at all            | A little bit          | Somewhat              | Quite a bit           | Very much             |
|------------------------------------------------------------------------------------------------------------------------------|-----------------------|-----------------------|-----------------------|-----------------------|-----------------------|
| 1. It was easy to participate in UPSIDES peer support sessions on a regular basis (Traveling, scheduling of sessions, etc.). | <input type="radio"/> | <input type="radio"/> | <input type="radio"/> | <input type="radio"/> | <input type="radio"/> |
| 2. The amount and duration of UPSIDES peer support was appropriate.                                                          | <input type="radio"/> | <input type="radio"/> | <input type="radio"/> | <input type="radio"/> | <input type="radio"/> |
| 3. It was possible to contact my UPSIDES peer support worker easily when needed.                                             | <input type="radio"/> | <input type="radio"/> | <input type="radio"/> | <input type="radio"/> | <input type="radio"/> |
| 4. I have actively participated in UPSIDES peer support sessions.                                                            | <input type="radio"/> | <input type="radio"/> | <input type="radio"/> | <input type="radio"/> | <input type="radio"/> |
| 5. I had no problems understanding what UPSIDES peer support is about.                                                       | <input type="radio"/> | <input type="radio"/> | <input type="radio"/> | <input type="radio"/> | <input type="radio"/> |
| 6. My UPSIDES peer support worker was sensitive to my questions and comments.                                                | <input type="radio"/> | <input type="radio"/> | <input type="radio"/> | <input type="radio"/> | <input type="radio"/> |
| 7. My UPSIDES peer support worker took time to listen to me.                                                                 | <input type="radio"/> | <input type="radio"/> | <input type="radio"/> | <input type="radio"/> | <input type="radio"/> |
| 8. My UPSIDES peer support worker provided social support important to me.                                                   | <input type="radio"/> | <input type="radio"/> | <input type="radio"/> | <input type="radio"/> | <input type="radio"/> |
| 9. My UPSIDES peer support worker showed me some skills that I have been able to transfer into my daily life.                | <input type="radio"/> | <input type="radio"/> | <input type="radio"/> | <input type="radio"/> | <input type="radio"/> |
| 10. My UPSIDES peer support worker gave me new ideas and perspectives which will remain important to me in the future.       | <input type="radio"/> | <input type="radio"/> | <input type="radio"/> | <input type="radio"/> | <input type="radio"/> |
| 11. My UPSIDES peer support worker was always well-prepared for our meetings.                                                | <input type="radio"/> | <input type="radio"/> | <input type="radio"/> | <input type="radio"/> | <input type="radio"/> |
| 12. My UPSIDES peer support worker was suitable / a good choice for this job.                                                | <input type="radio"/> | <input type="radio"/> | <input type="radio"/> | <input type="radio"/> | <input type="radio"/> |
| 13. My UPSIDES peer support worker was well-trained for this job.                                                            | <input type="radio"/> | <input type="radio"/> | <input type="radio"/> | <input type="radio"/> | <input type="radio"/> |
| 14. My UPSIDES peer support worker's behaviour was always appropriate and professional.                                      | <input type="radio"/> | <input type="radio"/> | <input type="radio"/> | <input type="radio"/> | <input type="radio"/> |
| 15. My peer support worker's wellbeing was always well enough to provide support to me.                                      | <input type="radio"/> | <input type="radio"/> | <input type="radio"/> | <input type="radio"/> | <input type="radio"/> |
| 16. My UPSIDES peer support worker had good relationships with other clinical staff members.                                 | <input type="radio"/> | <input type="radio"/> | <input type="radio"/> | <input type="radio"/> | <input type="radio"/> |
| My UPSIDES peer support worker:                                                                                              | Not at all            | A little bit          | Somewhat              | Quite a bit           | Very much             |
| 17. ... served as a role model and promoted hope.                                                                            | <input type="radio"/> | <input type="radio"/> | <input type="radio"/> | <input type="radio"/> | <input type="radio"/> |
| 18. ... empowered me to grow within and beyond my current mental health status.                                              | <input type="radio"/> | <input type="radio"/> | <input type="radio"/> | <input type="radio"/> | <input type="radio"/> |
| 19. ... supported me to regain control over my life.                                                                         | <input type="radio"/> | <input type="radio"/> | <input type="radio"/> | <input type="radio"/> | <input type="radio"/> |
| 20. ... helped me to reduce my isolation.                                                                                    | <input type="radio"/> | <input type="radio"/> | <input type="radio"/> | <input type="radio"/> | <input type="radio"/> |
| 21. ... helped me to communicate with my family and/or MH staff about my perspective and my treatment choices                | <input type="radio"/> | <input type="radio"/> | <input type="radio"/> | <input type="radio"/> | <input type="radio"/> |
| 22. ... has focussed on my strengths.                                                                                        | <input type="radio"/> | <input type="radio"/> | <input type="radio"/> | <input type="radio"/> | <input type="radio"/> |
| 23. ... has become a trusted companion                                                                                       | <input type="radio"/> | <input type="radio"/> | <input type="radio"/> | <input type="radio"/> | <input type="radio"/> |
| 24. ... did not tell me what to do but supported me to find my own solutions.                                                | <input type="radio"/> | <input type="radio"/> | <input type="radio"/> | <input type="radio"/> | <input type="radio"/> |
| 25. ... and I have both learned and benefitted from our peer support sessions.                                               | <input type="radio"/> | <input type="radio"/> | <input type="radio"/> | <input type="radio"/> | <input type="radio"/> |
| 26. ... has helped me to take part in my community.                                                                          | <input type="radio"/> | <input type="radio"/> | <input type="radio"/> | <input type="radio"/> | <input type="radio"/> |
| 27. ... helped me to see and use new opportunities                                                                           | <input type="radio"/> | <input type="radio"/> | <input type="radio"/> | <input type="radio"/> | <input type="radio"/> |
| 28. ... understood me and the situation I am in.                                                                             | <input type="radio"/> | <input type="radio"/> | <input type="radio"/> | <input type="radio"/> | <input type="radio"/> |

### UFS-P (peer support worker version) - English

|                                                                                                                       | <i>Not at all</i>     | <i>A little bit</i>   | <i>Somewhat</i>       | <i>Quite a bit</i>    | <i>Very much</i>      |
|-----------------------------------------------------------------------------------------------------------------------|-----------------------|-----------------------|-----------------------|-----------------------|-----------------------|
| 1. It was easy to provide UPSIDES peer support sessions on a regular basis. (Traveling, scheduling of sessions, etc.) | <input type="radio"/> | <input type="radio"/> | <input type="radio"/> | <input type="radio"/> | <input type="radio"/> |
| 2. My clients were satisfied with the amount of sessions and duration of support I could provide them in UPSIDES.     | <input type="radio"/> | <input type="radio"/> | <input type="radio"/> | <input type="radio"/> | <input type="radio"/> |
| 3. It was possible for service users to contact me easily when needed.                                                | <input type="radio"/> | <input type="radio"/> | <input type="radio"/> | <input type="radio"/> | <input type="radio"/> |
| 4. I was always well-prepared for the meetings with my clients.                                                       | <input type="radio"/> | <input type="radio"/> | <input type="radio"/> | <input type="radio"/> | <input type="radio"/> |
| 5. I felt that I was well-trained for this job.                                                                       | <input type="radio"/> | <input type="radio"/> | <input type="radio"/> | <input type="radio"/> | <input type="radio"/> |
| 6. My own wellbeing was always enough to provide peer support to my clients.                                          | <input type="radio"/> | <input type="radio"/> | <input type="radio"/> | <input type="radio"/> | <input type="radio"/> |
| 7. I had good relationships with other clinical staff members.                                                        | <input type="radio"/> | <input type="radio"/> | <input type="radio"/> | <input type="radio"/> | <input type="radio"/> |
| 8. Other mental health staff engaged with me during my work as PSW.                                                   | <input type="radio"/> | <input type="radio"/> | <input type="radio"/> | <input type="radio"/> | <input type="radio"/> |
| 9. Other mental health staff asked me for my point of view/ advice about mutual clients.                              | <input type="radio"/> | <input type="radio"/> | <input type="radio"/> | <input type="radio"/> | <input type="radio"/> |

As an UPSIDES peer support worker:

|                                                                                                                                 | <i>Not at all</i>     | <i>A little bit</i>   | <i>Somewhat</i>       | <i>Quite a bit</i>    | <i>Very much</i>      |
|---------------------------------------------------------------------------------------------------------------------------------|-----------------------|-----------------------|-----------------------|-----------------------|-----------------------|
| 10. ... I have served as a role model and promoted hope.                                                                        | <input type="radio"/> | <input type="radio"/> | <input type="radio"/> | <input type="radio"/> | <input type="radio"/> |
| 11. ... I have empowered my clients to grow within and beyond their current mental health status.                               | <input type="radio"/> | <input type="radio"/> | <input type="radio"/> | <input type="radio"/> | <input type="radio"/> |
| 12. ... I have enabled my clients to regain control over their lives.                                                           | <input type="radio"/> | <input type="radio"/> | <input type="radio"/> | <input type="radio"/> | <input type="radio"/> |
| 13. ... I have helped my clients to reduce their isolation.                                                                     | <input type="radio"/> | <input type="radio"/> | <input type="radio"/> | <input type="radio"/> | <input type="radio"/> |
| 14. ... I have helped my clients to communicate with their family and/or MH staff about their perspective and treatment choices | <input type="radio"/> | <input type="radio"/> | <input type="radio"/> | <input type="radio"/> | <input type="radio"/> |
| 15. ... I have focussed on the strengths of my clients.                                                                         | <input type="radio"/> | <input type="radio"/> | <input type="radio"/> | <input type="radio"/> | <input type="radio"/> |
| 16. ... I have become a trusted companion of my clients.                                                                        | <input type="radio"/> | <input type="radio"/> | <input type="radio"/> | <input type="radio"/> | <input type="radio"/> |
| 17. ... I did not tell my clients what to do but supported them to find their own solutions.                                    | <input type="radio"/> | <input type="radio"/> | <input type="radio"/> | <input type="radio"/> | <input type="radio"/> |
| 18. ... I have also learned and benefitted from the peer support sessions with my clients.                                      | <input type="radio"/> | <input type="radio"/> | <input type="radio"/> | <input type="radio"/> | <input type="radio"/> |
| 19. ... have helped my clients to take part in the community.                                                                   | <input type="radio"/> | <input type="radio"/> | <input type="radio"/> | <input type="radio"/> | <input type="radio"/> |
| 20. ... helped my clients to see and use new opportunities                                                                      | <input type="radio"/> | <input type="radio"/> | <input type="radio"/> | <input type="radio"/> | <input type="radio"/> |
| 21. ... I understood my clients and the situation they are in.                                                                  | <input type="radio"/> | <input type="radio"/> | <input type="radio"/> | <input type="radio"/> | <input type="radio"/> |

**UFS-S (service user version) - German**

|                                                                                                                                                       | <i>Lehne stark ab</i> | <i>Lehne ab</i>       | <i>Weder noch</i>     | <i>Stimme zu</i>      | <i>Stimme voll und ganz zu</i> |
|-------------------------------------------------------------------------------------------------------------------------------------------------------|-----------------------|-----------------------|-----------------------|-----------------------|--------------------------------|
| 1. Es war einfach, regelmäßig meine*n UPSIDES Peer-Begleiter*in zu treffen (Anreise, Planung, etc.).                                                  | <input type="radio"/> | <input type="radio"/> | <input type="radio"/> | <input type="radio"/> | <input type="radio"/>          |
| 2. Die Häufigkeit und Dauer der UPSIDES Peer-Begleitung war angemessen.                                                                               | <input type="radio"/> | <input type="radio"/> | <input type="radio"/> | <input type="radio"/> | <input type="radio"/>          |
| 3. Falls nötig, war es einfach, meine*n UPSIDES Peer-Begleiter*in zu kontaktieren.                                                                    | <input type="radio"/> | <input type="radio"/> | <input type="radio"/> | <input type="radio"/> | <input type="radio"/>          |
| 4. Ich habe aktiv an der UPSIDES Peer-Begleitung teilgenommen.                                                                                        | <input type="radio"/> | <input type="radio"/> | <input type="radio"/> | <input type="radio"/> | <input type="radio"/>          |
| 5. Ich hatte keine Probleme damit zu verstehen, um was es bei der UPSIDES Peer-Begleitung geht.                                                       | <input type="radio"/> | <input type="radio"/> | <input type="radio"/> | <input type="radio"/> | <input type="radio"/>          |
| 6. Mein*e UPSIDES Peer-Begleiter*in ging sensibel auf meine Fragen und Kommentare ein.                                                                | <input type="radio"/> | <input type="radio"/> | <input type="radio"/> | <input type="radio"/> | <input type="radio"/>          |
| 7. Mein*e UPSIDES Peer-Begleiter*in nahm sich Zeit, mir zuzuhören.                                                                                    | <input type="radio"/> | <input type="radio"/> | <input type="radio"/> | <input type="radio"/> | <input type="radio"/>          |
| 8. Mein*e UPSIDES Peer-Begleiter*in leistete soziale Unterstützung, die für mich wichtig war.                                                         | <input type="radio"/> | <input type="radio"/> | <input type="radio"/> | <input type="radio"/> | <input type="radio"/>          |
| 9. Durch meinen*meine Peer-Begleiter*in entdeckte ich Fähigkeiten, die ich in meinen Alltag integrieren konnte.                                       | <input type="radio"/> | <input type="radio"/> | <input type="radio"/> | <input type="radio"/> | <input type="radio"/>          |
| 10. Mein*e UPSIDES Peer-Begleiter*in zeigte mir neue Ideen und Perspektiven auf, die mir auch in Zukunft wichtig bleiben werden.                      | <input type="radio"/> | <input type="radio"/> | <input type="radio"/> | <input type="radio"/> | <input type="radio"/>          |
| 11. Mein*e UPSIDES Peer-Begleiter*in war auf unsere Treffen immer gut vorbereitet.                                                                    | <input type="radio"/> | <input type="radio"/> | <input type="radio"/> | <input type="radio"/> | <input type="radio"/>          |
| 12. Mein*e UPSIDES Peer-Begleiter*in war eine gute Wahl für diese Arbeit.                                                                             | <input type="radio"/> | <input type="radio"/> | <input type="radio"/> | <input type="radio"/> | <input type="radio"/>          |
| 13. Mein*e UPSIDES Peer-Begleiter*in war gut für diese Arbeit ausgebildet.                                                                            | <input type="radio"/> | <input type="radio"/> | <input type="radio"/> | <input type="radio"/> | <input type="radio"/>          |
| 14. Das Verhalten meine*r UPSIDES Peer-Begleiter*in war immer angemessen und professionell.                                                           | <input type="radio"/> | <input type="radio"/> | <input type="radio"/> | <input type="radio"/> | <input type="radio"/>          |
| 15. Das eigene Wohlbefinden meine*r UPSIDES Peer-Begleiter*in war immer gut genug, um mir Unterstützung zu geben.                                     | <input type="radio"/> | <input type="radio"/> | <input type="radio"/> | <input type="radio"/> | <input type="radio"/>          |
| 16. Mein*e UPSIDES Peer-Begleiter*in hatte gute Beziehungen zu anderen klinischen Mitarbeitern.                                                       | <input type="radio"/> | <input type="radio"/> | <input type="radio"/> | <input type="radio"/> | <input type="radio"/>          |
| Mein*e UPSIDES Peer-Begleiter*in...                                                                                                                   | <i>Lehne stark ab</i> | <i>Lehne ab</i>       | <i>Weder noch</i>     | <i>Stimme zu</i>      | <i>Stimme voll und ganz zu</i> |
| 17. ... diente mir als Vorbild und vermittelte mir Hoffnung.                                                                                          | <input type="radio"/> | <input type="radio"/> | <input type="radio"/> | <input type="radio"/> | <input type="radio"/>          |
| 18. ...stärkte mich innerhalb und über meinen aktuellen mentalen Gesundheitszustand hinauszuwachsen.                                                  | <input type="radio"/> | <input type="radio"/> | <input type="radio"/> | <input type="radio"/> | <input type="radio"/>          |
| 19. ...unterstützte mich darin, wieder Kontrolle über mein Leben zu erlangen.                                                                         | <input type="radio"/> | <input type="radio"/> | <input type="radio"/> | <input type="radio"/> | <input type="radio"/>          |
| 20. ... half mir dabei, meine Isolation zu verringern.                                                                                                | <input type="radio"/> | <input type="radio"/> | <input type="radio"/> | <input type="radio"/> | <input type="radio"/>          |
| 21. ... half mir dabei, mit meiner Familie und/oder medizinischen Fachkräften über meine Sichtweisen und meine Behandlungsentscheidungen zu sprechen. | <input type="radio"/> | <input type="radio"/> | <input type="radio"/> | <input type="radio"/> | <input type="radio"/>          |
| 22. ... fokussierte sich auf meine Stärken.                                                                                                           | <input type="radio"/> | <input type="radio"/> | <input type="radio"/> | <input type="radio"/> | <input type="radio"/>          |
| 23. ... wurde zu einem*einer vertrauten Begleiter*in.                                                                                                 | <input type="radio"/> | <input type="radio"/> | <input type="radio"/> | <input type="radio"/> | <input type="radio"/>          |
| 24. ...sagte mir nicht, was zu tun war, sondern half mir, meine eigenen Lösungen zu finden.                                                           | <input type="radio"/> | <input type="radio"/> | <input type="radio"/> | <input type="radio"/> | <input type="radio"/>          |
| 25. ... und ich haben beide von der Peer-Begleitung gelernt und profitiert.                                                                           | <input type="radio"/> | <input type="radio"/> | <input type="radio"/> | <input type="radio"/> | <input type="radio"/>          |
| 26. ... half mir, wieder am gesellschaftlichen Leben teilzunehmen.                                                                                    | <input type="radio"/> | <input type="radio"/> | <input type="radio"/> | <input type="radio"/> | <input type="radio"/>          |
| 27. ... half mir, neue Möglichkeiten zu erkennen und zu nutzen.                                                                                       | <input type="radio"/> | <input type="radio"/> | <input type="radio"/> | <input type="radio"/> | <input type="radio"/>          |
| 28. ...hat mich, und die Situation in der ich bin, verstanden.                                                                                        | <input type="radio"/> | <input type="radio"/> | <input type="radio"/> | <input type="radio"/> | <input type="radio"/>          |

**UFS-P (peer support worker version) – German**

|                                                                                                                                                                   | <i>Lehne stark ab</i> | <i>Lehne ab</i>       | <i>Weder noch</i>     | <i>Stimme zu</i>      | <i>Stimme voll und ganz zu</i> |
|-------------------------------------------------------------------------------------------------------------------------------------------------------------------|-----------------------|-----------------------|-----------------------|-----------------------|--------------------------------|
| 1. Es war leicht UPSIDES Peer-Begleitung regelmäßig anzubieten. (Anreise, Planung, etc.)                                                                          | <input type="radio"/> | <input type="radio"/> | <input type="radio"/> | <input type="radio"/> | <input type="radio"/>          |
| 2. Mein*e Klient*in war mit der Häufigkeit und Dauer der Treffen, die ich im Rahmen von UPSIDES anbieten konnte, zufrieden.                                       | <input type="radio"/> | <input type="radio"/> | <input type="radio"/> | <input type="radio"/> | <input type="radio"/>          |
| 3. Wenn nötig, war es für meine*n Klientin*en leicht, mich zu kontaktieren.                                                                                       | <input type="radio"/> | <input type="radio"/> | <input type="radio"/> | <input type="radio"/> | <input type="radio"/>          |
| 4. Für die Treffen mit meinem*r Klienten*in war ich immer gut vorbereitet.                                                                                        | <input type="radio"/> | <input type="radio"/> | <input type="radio"/> | <input type="radio"/> | <input type="radio"/>          |
| 5. Ich fühlte mich für die Arbeit als Peer-Begleiter*in gut ausgebildet.                                                                                          | <input type="radio"/> | <input type="radio"/> | <input type="radio"/> | <input type="radio"/> | <input type="radio"/>          |
| 6. Mein eigenes Wohlbefinden war immer gut genug, um meine*n Klientin*en zu unterstützen.                                                                         | <input type="radio"/> | <input type="radio"/> | <input type="radio"/> | <input type="radio"/> | <input type="radio"/>          |
| 7. Ich hatte gute Beziehungen zu anderen klinischen Mitarbeitern*innen.                                                                                           | <input type="radio"/> | <input type="radio"/> | <input type="radio"/> | <input type="radio"/> | <input type="radio"/>          |
| 8. Während meiner Arbeit als Peer-Begleiter*in haben sich andere klinische Mitarbeiter*innen mit mir unterhalten.                                                 | <input type="radio"/> | <input type="radio"/> | <input type="radio"/> | <input type="radio"/> | <input type="radio"/>          |
| 9. Andere klinische Mitarbeiter*innen haben mich nach meiner Meinung oder einem Rat zum unserem*r gemeinsamen Klienten*in gefragt.                                | <input type="radio"/> | <input type="radio"/> | <input type="radio"/> | <input type="radio"/> | <input type="radio"/>          |
| Als UPSIDES Peer-Begleiter*in...                                                                                                                                  | <i>Lehne stark ab</i> | <i>Lehne ab</i>       | <i>Weder noch</i>     | <i>Stimme zu</i>      | <i>Stimme voll und ganz zu</i> |
| 10. ... diente ich als Vorbild und vermittelte Hoffnung.                                                                                                          | <input type="radio"/> | <input type="radio"/> | <input type="radio"/> | <input type="radio"/> | <input type="radio"/>          |
| 11. ... stärkte ich meine*n Klientin*en, innerhalb und über ihren*seinen aktuellen mentalen Gesundheitsstand hinauszuwachsen.                                     | <input type="radio"/> | <input type="radio"/> | <input type="radio"/> | <input type="radio"/> | <input type="radio"/>          |
| 12. ... unterstützte ich meine*n Klientin*en darin, wieder Kontrolle über ihr*sein Leben zu erlangen.                                                             | <input type="radio"/> | <input type="radio"/> | <input type="radio"/> | <input type="radio"/> | <input type="radio"/>          |
| 13. ... half ich meinem*r Klienten*in dabei, seine*ihre Isolation zu verringern.                                                                                  | <input type="radio"/> | <input type="radio"/> | <input type="radio"/> | <input type="radio"/> | <input type="radio"/>          |
| 14. ... half ich meinem*r Klienten*in dabei, mit seiner*ihrer Familie und/oder Fachkräften über seine*ihre Sichtweisen und Behandlungsentscheidungen zu sprechen. | <input type="radio"/> | <input type="radio"/> | <input type="radio"/> | <input type="radio"/> | <input type="radio"/>          |
| 15. ... fokussierte ich mich auf die Stärken meines*r Klienten*in.                                                                                                | <input type="radio"/> | <input type="radio"/> | <input type="radio"/> | <input type="radio"/> | <input type="radio"/>          |
| 16. ... wurde ich zu einem*r vertrauten Begleiter*in für meine*n Klientin*en.                                                                                     | <input type="radio"/> | <input type="radio"/> | <input type="radio"/> | <input type="radio"/> | <input type="radio"/>          |
| 17. ... sagte ich meinem*r Klienten*in nicht, was zu tun war, sondern half ihm*ihr, eigene Lösungen zu finden.                                                    | <input type="radio"/> | <input type="radio"/> | <input type="radio"/> | <input type="radio"/> | <input type="radio"/>          |
| 18. ... habe auch ich von der Peer-Begleitung meines*r Klienten*in gelernt und profitiert.                                                                        | <input type="radio"/> | <input type="radio"/> | <input type="radio"/> | <input type="radio"/> | <input type="radio"/>          |
| 19. ... half ich meinem*r Klienten*in, am gesellschaftlichen Leben teilzunehmen.                                                                                  | <input type="radio"/> | <input type="radio"/> | <input type="radio"/> | <input type="radio"/> | <input type="radio"/>          |
| 20. ... half ich meinem*r Klienten*in, neue Chancen und Möglichkeiten zu erkennen und zu nutzen.                                                                  | <input type="radio"/> | <input type="radio"/> | <input type="radio"/> | <input type="radio"/> | <input type="radio"/>          |
| 21. ... verstand ich meine*n Klientin*en und die Situation, in der sie*er sich befand.                                                                            | <input type="radio"/> | <input type="radio"/> | <input type="radio"/> | <input type="radio"/> | <input type="radio"/>          |

**UFS-S (service user version) - Luganda**

|                                                                                                                                                                                              | Tewali<br>n' akatono  | Kitonotono            | Akatonotono           | Kinene ko             | Nnyo nnyini<br>Ddala  |
|----------------------------------------------------------------------------------------------------------------------------------------------------------------------------------------------|-----------------------|-----------------------|-----------------------|-----------------------|-----------------------|
| 1. Kyalikyangu bulilunaku okw'etaba mu nkungaana ez'okukubaganya ebirowoozo ez'abakozesa b'obujjanjabi era abayamba bann'abwe eza UPSIDES ( okutambula, okuteekateeka enkungaana n' ebilala) | <input type="radio"/> | <input type="radio"/> | <input type="radio"/> | <input type="radio"/> | <input type="radio"/> |
| 2. Omuwendo n'obudde okuyambagana kw'abakozesa b'obujjanjabi okwa UPSIDES bwewatwaala bwaalibusanidde                                                                                        | <input type="radio"/> | <input type="radio"/> | <input type="radio"/> | <input type="radio"/> | <input type="radio"/> |
| 3. Kyali kisoboka okuwuliziganya n'omukozi wa UPSIDES bwetukozesa obujjanjabi era annyamba mubwangu weky'ali ky'etaagisizza                                                                  | <input type="radio"/> | <input type="radio"/> | <input type="radio"/> | <input type="radio"/> | <input type="radio"/> |
| 4. Mbadde mujjumbize mukwetaba mu nkungaana eza UPSIDES ez'okukubaganya ebirowoozo ez'abakozesa b'obujjanjabi era abayamba bann'abwe                                                         | <input type="radio"/> | <input type="radio"/> | <input type="radio"/> | <input type="radio"/> | <input type="radio"/> |
| 5. Salina buzibu okutegeera biki ebikwatagana kukukozesa obujjanjabi bw'okuyamba abalala mu UPSIDES                                                                                          | <input type="radio"/> | <input type="radio"/> | <input type="radio"/> | <input type="radio"/> | <input type="radio"/> |
| 6. Omukozesa munnange ow'obujjanjabi akola omulimu gw'okunyamba owa UPSIDES yali afaayo eri ebibuuzo ne byennamugambanga/endowooza yange                                                     | <input type="radio"/> | <input type="radio"/> | <input type="radio"/> | <input type="radio"/> | <input type="radio"/> |
| 7. Omukozesa munnange ow'obujjanjabi akola omulimu gw'okunyamba owa UPSIDES yatwaala obudde okumpuliriza.                                                                                    | <input type="radio"/> | <input type="radio"/> | <input type="radio"/> | <input type="radio"/> | <input type="radio"/> |
| 8. Omukozesa munnange ow'obujjanjabi akola omulimu gw'okunyamba owa UPSIDES yampa obuyambi mu mbeera eyabulijjo obw'amakulu gyendi                                                           | <input type="radio"/> | <input type="radio"/> | <input type="radio"/> | <input type="radio"/> | <input type="radio"/> |
| 9. Omukozesa munnange ow'obujjanjabi akola omulimu gw'okunyamba owa UPSIDES yandaga obumu kubukodyo bw'ensobodde okukozesa mubulamu bwange obw'abulijjo                                      | <input type="radio"/> | <input type="radio"/> | <input type="radio"/> | <input type="radio"/> | <input type="radio"/> |
| 10. Omukozesa munnange ow'obujjanjabi akolaomulimu gw'okunyamba owa UPSIDES yampa endowooza empya n'engeri ez'enjawulo ezijja okusigala nga zamugaso gyendi mu biseera eby'omumaaso          | <input type="radio"/> | <input type="radio"/> | <input type="radio"/> | <input type="radio"/> | <input type="radio"/> |
| 11. Omukozi munnange aw'obujjanjabi owa UPSIDES yabeeranga mwetegefu eri enkiko zaffe                                                                                                        | <input type="radio"/> | <input type="radio"/> | <input type="radio"/> | <input type="radio"/> | <input type="radio"/> |
| 12. Omukozesa munnange ow'obujjanjabi owa UPSIDES yali asaanidde/ eky'okusalawo ekirungi eri omulimu guno                                                                                    | <input type="radio"/> | <input type="radio"/> | <input type="radio"/> | <input type="radio"/> | <input type="radio"/> |
| 13. Omukozesa munnange ow'obujjanjabi owa UPSIDES yali mutendeke bulungi eri omulimu guno                                                                                                    | <input type="radio"/> | <input type="radio"/> | <input type="radio"/> | <input type="radio"/> | <input type="radio"/> |
| 14. Empisa z'omukozesa munnange ow'obujjanjabi owa UPSIDES zalinga z'ezisaanidde era ngaz'ezabatendeke                                                                                       | <input type="radio"/> | <input type="radio"/> | <input type="radio"/> | <input type="radio"/> | <input type="radio"/> |
| 15. Embeera y'obulamu bw'omukozesa munnange ow'obujjanjabi owa UPSIDES yalinga nnungi ekimala bulikiseera nga annyamba                                                                       | <input type="radio"/> | <input type="radio"/> | <input type="radio"/> | <input type="radio"/> | <input type="radio"/> |
| 16. Omukozesa munnange ow'obujjanjabi owa UPSIDES yalina enkolagana ennungi n'abasawo abalala                                                                                                | <input type="radio"/> | <input type="radio"/> | <input type="radio"/> | <input type="radio"/> | <input type="radio"/> |
| Omukozesa munnange ow'obujjanjabi akola omulimu gw'okunyamba owa UPSIDES ...                                                                                                                 | Tewali<br>n' akatono  | Kitonotono            | Akatonotono           | Kinene ko             | Nnyo nnyini<br>Ddala  |
| 17. ....Yakola nga eky'okulabirako era yalinyisa essubi                                                                                                                                      | <input type="radio"/> | <input type="radio"/> | <input type="radio"/> | <input type="radio"/> | <input type="radio"/> |
| 18. ....yampa amanyi agansobozesa okukula mundamunze n'okusukkawo kumbeera yange ey'obw'ongo gyendimu kati                                                                                   | <input type="radio"/> | <input type="radio"/> | <input type="radio"/> | <input type="radio"/> | <input type="radio"/> |
| 19. ....yannyanba okuddamu okusobola okufuga obulamu bwange                                                                                                                                  | <input type="radio"/> | <input type="radio"/> | <input type="radio"/> | <input type="radio"/> | <input type="radio"/> |

|                                                                                                                                                                                       | <i>Tewali<br/>n' akatono</i> | <i>Kitonotono</i>     | <i>Akatonotono</i>    | <i>Kinene ko</i>      | <i>Nnyo nnyini<br/>Ddala</i> |
|---------------------------------------------------------------------------------------------------------------------------------------------------------------------------------------|------------------------------|-----------------------|-----------------------|-----------------------|------------------------------|
| 20. ....yannyamba okukendezaako kukweyawula kubalala                                                                                                                                  | <input type="radio"/>        | <input type="radio"/> | <input type="radio"/> | <input type="radio"/> | <input type="radio"/>        |
| 21. ....yannyamba okusobola okuwuliziganya n'abewaka awamu/ oba abasawo abajjanjaba obulwadde bw'obwongo kubikwaatagana nengeri gyendabamu ebintu n'okusalawo kugw'obujjanjabi bwange | <input type="radio"/>        | <input type="radio"/> | <input type="radio"/> | <input type="radio"/> | <input type="radio"/>        |
| 22. ....afuddeyo nnyo kubusobozi bwange/ amanyi gange                                                                                                                                 | <input type="radio"/>        | <input type="radio"/> | <input type="radio"/> | <input type="radio"/> | <input type="radio"/>        |
| 23. ....afuuse munnange eyesigika                                                                                                                                                     | <input type="radio"/>        | <input type="radio"/> | <input type="radio"/> | <input type="radio"/> | <input type="radio"/>        |
| 24. ....teyandagira kyakukola, wabula yannyamba okuzuula eky'okuddamu eri ebizibu byange                                                                                              | <input type="radio"/>        | <input type="radio"/> | <input type="radio"/> | <input type="radio"/> | <input type="radio"/>        |
| 25. ....era njize awamu n'okuganyurwa mu nkungaana zaffe ez'okukubaganyizaamu ebirowoozo ez'okuyambagana                                                                              | <input type="radio"/>        | <input type="radio"/> | <input type="radio"/> | <input type="radio"/> | <input type="radio"/>        |
| 26. ....annyambyeko mukweetaba/ mukwenyigira mu bikolebwa mu kitundu kyange                                                                                                           | <input type="radio"/>        | <input type="radio"/> | <input type="radio"/> | <input type="radio"/> | <input type="radio"/>        |
| 27. .... Annyambye ko okulaba n'okukozesa emikisa emipya                                                                                                                              | <input type="radio"/>        | <input type="radio"/> | <input type="radio"/> | <input type="radio"/> | <input type="radio"/>        |
| 28. ....yanteegera awamu n'embeera gyendimu                                                                                                                                           | <input type="radio"/>        | <input type="radio"/> | <input type="radio"/> | <input type="radio"/> | <input type="radio"/>        |

## UFS-P (peer support worker version) – Luganda

|                                                                                                                                                                                   | Tewali<br>n' akatono  | Kitonotono            | Akatonotono           | Kinene ko             | Nnyo nnyini<br>Ddala  |
|-----------------------------------------------------------------------------------------------------------------------------------------------------------------------------------|-----------------------|-----------------------|-----------------------|-----------------------|-----------------------|
| 1. Kyalikyangu okutekawo enkungaana za UPSIDES ez'okukubaganyizaamu ebirowoozo era ez'okuyambagana bulilunaku (okutambula , okutegeka enkungaana n'ebilala)                       | <input type="radio"/> | <input type="radio"/> | <input type="radio"/> | <input type="radio"/> | <input type="radio"/> |
| 2. Omukozesa ow'obujjanjabi gwe nnyamba yaali mumativu n'obunji bw'enkungaana awamu n'obudde bwenamala nga muyamba                                                                | <input type="radio"/> | <input type="radio"/> | <input type="radio"/> | <input type="radio"/> | <input type="radio"/> |
| 3. Kyalikisoboka eri omukozesa ow'obujjanjabi gwe nnyamba okunfuna amangu lwe kyalinga ky'etaagisizza                                                                             | <input type="radio"/> | <input type="radio"/> | <input type="radio"/> | <input type="radio"/> | <input type="radio"/> |
| 4. Nalinga mwetegefu bulungi okusisinkana n'omukozesa munnange ow'obujjanjabi gwe nnyamba                                                                                         | <input type="radio"/> | <input type="radio"/> | <input type="radio"/> | <input type="radio"/> | <input type="radio"/> |
| 5. Nnali nneewulira nti ntendekeddwa bulungi eri omulimu guno                                                                                                                     | <input type="radio"/> | <input type="radio"/> | <input type="radio"/> | <input type="radio"/> | <input type="radio"/> |
| 6. Embeera y'obulamu bwange yalinga nnungi ekimala okugaba obuyambi eri mukozesa munnange ow'obujjanjabi gwe nnyamba                                                              | <input type="radio"/> | <input type="radio"/> | <input type="radio"/> | <input type="radio"/> | <input type="radio"/> |
| 7. Nalina enkolagana ennungi n'abasawo abalala                                                                                                                                    | <input type="radio"/> | <input type="radio"/> | <input type="radio"/> | <input type="radio"/> | <input type="radio"/> |
| 8. Abasawo abalala abajjanjaba obulwadde b'obwongo be nnyigiranga wamu nange nga nkola omulimu gwange ogw'okuyamba bannange                                                       | <input type="radio"/> | <input type="radio"/> | <input type="radio"/> | <input type="radio"/> | <input type="radio"/> |
| 9. Abasawo abalala abajjanjaba obulwadde bw'obwongo bannebuuzangako nga nkola omulimu gw'okuyamba bannange okusinziira kundowooza yange/ okw'ebuuza kubikwaatagana n'abalwadde    | <input type="radio"/> | <input type="radio"/> | <input type="radio"/> | <input type="radio"/> | <input type="radio"/> |
| Nga omukozi wa UPSIDES akola ogw'okuyamba bakozesa banne ab'obujjanjabi...                                                                                                        |                       |                       |                       |                       |                       |
|                                                                                                                                                                                   | Tewali<br>n' akatono  | Kitonotono            | Akatonotono           | Kinene ko             | Nnyo nnyini<br>Ddala  |
| 10. ... Mpeereza nga eky'okulabirako era nyimusiza essuubi                                                                                                                        | <input type="radio"/> | <input type="radio"/> | <input type="radio"/> | <input type="radio"/> | <input type="radio"/> |
| 11. ... Nyimusiza omukozesa munnange ow'obujjanjabi okukula munda n'okusukka kumbeeraye ey'obw'ongo gy'ebalimu kati                                                               | <input type="radio"/> | <input type="radio"/> | <input type="radio"/> | <input type="radio"/> | <input type="radio"/> |
| 12. ... Nsobozeseza mukozesa munnange ow'obujjanjabi okuddamu okusobola okufuga obulamu bwe                                                                                       | <input type="radio"/> | <input type="radio"/> | <input type="radio"/> | <input type="radio"/> | <input type="radio"/> |
| 13. ... nnyambye mukozesa munnange ow'obujjanjabi okukendezaako ku kweyawula ku balala                                                                                            | <input type="radio"/> | <input type="radio"/> | <input type="radio"/> | <input type="radio"/> | <input type="radio"/> |
| 14. ... nnyambye mukozesa munnange ow'obujjanjabi okuwuliziganya n'ab'ewaka awamu/ oba n'abasawo abajjanjaba endwadde z'obwongo kubikwaatagana n'engeri y'okukozesamu obujjanjabi | <input type="radio"/> | <input type="radio"/> | <input type="radio"/> | <input type="radio"/> | <input type="radio"/> |
| 15. ... Nfuddeyo nnyo ku busobozi bw'omukozesa wange ow'obujjanjabi                                                                                                               | <input type="radio"/> | <input type="radio"/> | <input type="radio"/> | <input type="radio"/> | <input type="radio"/> |
| 16. ... Nfuuse munne eyeesigika.                                                                                                                                                  | <input type="radio"/> | <input type="radio"/> | <input type="radio"/> | <input type="radio"/> | <input type="radio"/> |
| 17. ... Omukozesa wange ow'obujjanjabi saamulagiriranga byakukola wabula namuyambako okw'ezulira eby'okuddamu                                                                     | <input type="radio"/> | <input type="radio"/> | <input type="radio"/> | <input type="radio"/> | <input type="radio"/> |
| 18. ... Era njize awamu n'okuganyurwa mu nkungaana z'etubeeramu nomukozesa wange ow'obujjanjabi.                                                                                  | <input type="radio"/> | <input type="radio"/> | <input type="radio"/> | <input type="radio"/> | <input type="radio"/> |
| 19. ... Nnyambyeko omukozesa w'obujjanjabi wange okusobola okw'enyigira mu bikolebwa kukyaalo.                                                                                    | <input type="radio"/> | <input type="radio"/> | <input type="radio"/> | <input type="radio"/> | <input type="radio"/> |
| 20. ... Nayamba omukozesa w'obujjanjabi wange okulaba n'okukozesa emikisa egiba gizze                                                                                             | <input type="radio"/> | <input type="radio"/> | <input type="radio"/> | <input type="radio"/> | <input type="radio"/> |
| 21. ... Nategeera omukozesa w'obujjanjabi wange awamu n'embeera gyalimu.                                                                                                          | <input type="radio"/> | <input type="radio"/> | <input type="radio"/> | <input type="radio"/> | <input type="radio"/> |

**UFS-S (service user version) - Swahili**

|                                                                                                                                       | Hapana kabisa         | Kidogo sana           | Kwa kiasi fulani      | Kidogo                | Sana                  |
|---------------------------------------------------------------------------------------------------------------------------------------|-----------------------|-----------------------|-----------------------|-----------------------|-----------------------|
| 1. Ilikuwa rahisi kushiriki katika vikao vya uwezeshaji rika vya mradi wa UPSIDES mara kwa mara (Kusafiri, kupanga vipindi, nk)       | <input type="radio"/> | <input type="radio"/> | <input type="radio"/> | <input type="radio"/> | <input type="radio"/> |
| 2. Muda ambao mradi wa UPSIDES wa uwezeshaji rika ulitekelezwa ulikuwa sahihi                                                         | <input type="radio"/> | <input type="radio"/> | <input type="radio"/> | <input type="radio"/> | <input type="radio"/> |
| 3. Iliwezekana kuwasiliana na mwezeshaji rika wangu wa mradi wa UPSIDES kwa urahisi wakati inahitajika.                               | <input type="radio"/> | <input type="radio"/> | <input type="radio"/> | <input type="radio"/> | <input type="radio"/> |
| 4. Nimeshirika kwa ukamilifu kwenye vipindi vya uwezeshaji rika kwenye mradi wa UPSIDES.                                              | <input type="radio"/> | <input type="radio"/> | <input type="radio"/> | <input type="radio"/> | <input type="radio"/> |
| 5. Sikuwa na matatizo katika kuelewa kuhusu uwezeshaji rika kwenye mradi wa UPSIDES.                                                  | <input type="radio"/> | <input type="radio"/> | <input type="radio"/> | <input type="radio"/> | <input type="radio"/> |
| 6. Mwezeshaji rika wangu kwenye mradi wa UPSIDES alikuwa makini kwa maswali na maoni yangu.                                           | <input type="radio"/> | <input type="radio"/> | <input type="radio"/> | <input type="radio"/> | <input type="radio"/> |
| 7. Mwezeshaji rika wangu kwenye mradi wa UPSIDES alichukua muda kunisikiliza.                                                         | <input type="radio"/> | <input type="radio"/> | <input type="radio"/> | <input type="radio"/> | <input type="radio"/> |
| 8. Mwezeshaji rika wangu kwenye mradi wa UPSIDES alitoa msaada wa kijamii ambao ulikuwa muhimu kwangu.                                | <input type="radio"/> | <input type="radio"/> | <input type="radio"/> | <input type="radio"/> | <input type="radio"/> |
| 9. Mwezeshaji rika wangu kwenye mradi wa UPSIDES alinionyesha ujuzi kadhaa ambao nimeweza kuhamisha katika maisha yangu ya kila siku. | <input type="radio"/> | <input type="radio"/> | <input type="radio"/> | <input type="radio"/> | <input type="radio"/> |
| 10. Mwezeshaji rika wangu kwenye mradi wa UPSIDES alinipa maoni mapya na mitazamo ambayo itabaki muhimu kwangu katika siku zijazo.    | <input type="radio"/> | <input type="radio"/> | <input type="radio"/> | <input type="radio"/> | <input type="radio"/> |
| 11. Mfanyakazi wangu wa msaada wa rika kwenye mradi wa UPSIDES alikuwa amejandaa vizuri kila wakati kwa ajili ya mikutano yetu.       | <input type="radio"/> | <input type="radio"/> | <input type="radio"/> | <input type="radio"/> | <input type="radio"/> |
| 12. Mfanyakazi wangu wa Msaada wa rika kwenye mradi wa UPSIDES alikuwa mzuri/chaguo sahihi kwa kazi hii.                              | <input type="radio"/> | <input type="radio"/> | <input type="radio"/> | <input type="radio"/> | <input type="radio"/> |
| 13. Mfanyakazi wangu wa msaada wa rika kwenye mradi wa UPSIDES alikuwa amefundishwa vizuri kwa ajili ya kazi hii.                     | <input type="radio"/> | <input type="radio"/> | <input type="radio"/> | <input type="radio"/> | <input type="radio"/> |
| 14. Tabia ya mfanyakazi wangu wa msaada wa rika kwenye mradi wa UPSIDES ilikuwa sahihi na ya kitaaluma kila wakati.                   | <input type="radio"/> | <input type="radio"/> | <input type="radio"/> | <input type="radio"/> | <input type="radio"/> |
| 15. Ustawi wa mfanyakazi wangu wa msaada rika kwenye mradi wa UPSIDES ulikuwa unatosha mara zote kwa ajili ya kunisaidia.             | <input type="radio"/> | <input type="radio"/> | <input type="radio"/> | <input type="radio"/> | <input type="radio"/> |
| 16. Mfanyakazi wangu wa msaada rika kwenye mradi wa UPSIDES alikuwa na mahusiano mazuri na wafanyakazi wengine wa kitabibu.           | <input type="radio"/> | <input type="radio"/> | <input type="radio"/> | <input type="radio"/> | <input type="radio"/> |
| Mwezeshaji rika wangu kwenye mradi wa UPSIDES...                                                                                      | Hapana Kabisa         | Kidogo sana           | Kwa kiasi fulani      | Kidogo                | Sana                  |
| 17. ... Alikuwa mfano wa kuigwa na alikuza matumaini.                                                                                 | <input type="radio"/> | <input type="radio"/> | <input type="radio"/> | <input type="radio"/> | <input type="radio"/> |
| 18. .... Alinipa uwezo wa kukua ndani na zaidi ya hali yangu ya afya ya akili kwa sasa.                                               | <input type="radio"/> | <input type="radio"/> | <input type="radio"/> | <input type="radio"/> | <input type="radio"/> |
| 19. ....alinisaidia kupata tena udhibiti juu ya maisha yangu.                                                                         | <input type="radio"/> | <input type="radio"/> | <input type="radio"/> | <input type="radio"/> | <input type="radio"/> |
| 20. ... Alinisaidia kupunguza kutengwa kwangu.                                                                                        | <input type="radio"/> | <input type="radio"/> | <input type="radio"/> | <input type="radio"/> | <input type="radio"/> |
| 21. ... Amenisaidia kuwasiliana na familia yangu na wafanyakazi wa afya ya akili kuhusu mtazamo wangu na uchaguzi wa matibabu.        | <input type="radio"/> | <input type="radio"/> | <input type="radio"/> | <input type="radio"/> | <input type="radio"/> |
| 22. ... Amezingatia nguvu zangu.                                                                                                      | <input type="radio"/> | <input type="radio"/> | <input type="radio"/> | <input type="radio"/> | <input type="radio"/> |
| 23. ... Amekuwa rafiki wa kuaminika.                                                                                                  | <input type="radio"/> | <input type="radio"/> | <input type="radio"/> | <input type="radio"/> | <input type="radio"/> |
| 24. ... Hakuniambia nifanye nini, lakini aliniunga mkono kupata suluhisho zangu mwenyewe.                                             | <input type="radio"/> | <input type="radio"/> | <input type="radio"/> | <input type="radio"/> | <input type="radio"/> |
| 25. ... na mimi wote tumejifunza na kufaidika kutokana na vipindi vyetu vya msaada wa rika.                                           | <input type="radio"/> | <input type="radio"/> | <input type="radio"/> | <input type="radio"/> | <input type="radio"/> |
| 26. ...Amenisaidia kushiriki katika jamii yangu.                                                                                      | <input type="radio"/> | <input type="radio"/> | <input type="radio"/> | <input type="radio"/> | <input type="radio"/> |

|                                                         | <i>Hapana kabisa</i>  | <i>Kidogo sana</i>    | <i>Kwa kiasi fulani</i> | <i>Kidogo</i>         | <i>Sana</i>           |
|---------------------------------------------------------|-----------------------|-----------------------|-------------------------|-----------------------|-----------------------|
| 27. ... Amenisaidia kuona na kutumia fursa mpya.        | <input type="radio"/> | <input type="radio"/> | <input type="radio"/>   | <input type="radio"/> | <input type="radio"/> |
| 28. ... Alinielewa mimi pamoja na hali niliyokuwa nayo. | <input type="radio"/> | <input type="radio"/> | <input type="radio"/>   | <input type="radio"/> | <input type="radio"/> |

**UFP-P (peer support worker version) - Swahili**

|                                                                                                                           | Hapana kabisa         | Kidogo                | Kwa kiasi fulani      | Kidogo                | Sana                  |
|---------------------------------------------------------------------------------------------------------------------------|-----------------------|-----------------------|-----------------------|-----------------------|-----------------------|
| 1. Ilikuwa rahisi kutoa vipindi vya uwezeshaji rika kwenye mradi wa UPSIDES mara kwa mara (Kusafiri, kupanga vipindi, nk) | <input type="radio"/> | <input type="radio"/> | <input type="radio"/> | <input type="radio"/> | <input type="radio"/> |
| 2. Mteja wangu aliridhika na idadi ya vipindi na muda wamsaada ambao ningeweza kumpatia kwenye mradi wa UPSIDES.          | <input type="radio"/> | <input type="radio"/> | <input type="radio"/> | <input type="radio"/> | <input type="radio"/> |
| 3. Ilikuwa inawezekana kwa mteja wangu kuwasiliana na mimi kwa urahisi wakati ilipohitajika.                              | <input type="radio"/> | <input type="radio"/> | <input type="radio"/> | <input type="radio"/> | <input type="radio"/> |
| 4. Nilikuwa nimejiandaa vya kutosha kila wakati kwa ajili ya mikutano na mteja wangu                                      | <input type="radio"/> | <input type="radio"/> | <input type="radio"/> | <input type="radio"/> | <input type="radio"/> |
| 5. Nilihihi kwamba nimepata mafunzo ya kutosha kwa ajili ya hii kazi.                                                     | <input type="radio"/> | <input type="radio"/> | <input type="radio"/> | <input type="radio"/> | <input type="radio"/> |
| 6. Ustawi wangu ulikuwa unatosha mara zote kutoa msaada wa rika kwa mteja wangu                                           | <input type="radio"/> | <input type="radio"/> | <input type="radio"/> | <input type="radio"/> | <input type="radio"/> |
| 7. Nilikuwa na mahusiano mazuri na wafanyakazi wengine wa kitabibu.                                                       | <input type="radio"/> | <input type="radio"/> | <input type="radio"/> | <input type="radio"/> | <input type="radio"/> |
| 8. Wafanyakazi wengine wa afya ya akili walishirikiana na mimi wakati nafanya kazi kama mwezeshaji rika.                  | <input type="radio"/> | <input type="radio"/> | <input type="radio"/> | <input type="radio"/> | <input type="radio"/> |
| 9. Wafanyakazi wengine wa afya ya akili waliomba maoni yangu au ushauri kuhusu mteja wetu wa pamoja.                      | <input type="radio"/> | <input type="radio"/> | <input type="radio"/> | <input type="radio"/> | <input type="radio"/> |

Kama mfanyakazi wa msaada rika kwenye mradi wa UPSIDES...

|                                                                                                                                           | Hapana kabisa         | Kidogo                | Kwa kiasi fulani      | Kidogo                | Sana                  |
|-------------------------------------------------------------------------------------------------------------------------------------------|-----------------------|-----------------------|-----------------------|-----------------------|-----------------------|
| 10. ... Nimekuwa mfano wa kuigwa na nimekuza matumaini.                                                                                   | <input type="radio"/> | <input type="radio"/> | <input type="radio"/> | <input type="radio"/> | <input type="radio"/> |
| 11. ... Nimempa uwezo mteja wangu kukua ndani na Zaidi ya hali yake ya sasa ya afya ya akili.                                             | <input type="radio"/> | <input type="radio"/> | <input type="radio"/> | <input type="radio"/> | <input type="radio"/> |
| 12. ... Nimemuwezesha mteja wangu kupata tena udhibiti juu ya maisha yake.                                                                | <input type="radio"/> | <input type="radio"/> | <input type="radio"/> | <input type="radio"/> | <input type="radio"/> |
| 13. ... Nimemsaidia mteja wangu kupunguza kutengwa kwake.                                                                                 | <input type="radio"/> | <input type="radio"/> | <input type="radio"/> | <input type="radio"/> | <input type="radio"/> |
| 14. ... Nimemsaidia mteja wangu kuwasiliana na familia yake au wafanyakazi wa afya ya akili kuhusu mitazamo yake na uchaguzi wa matibabu. | <input type="radio"/> | <input type="radio"/> | <input type="radio"/> | <input type="radio"/> | <input type="radio"/> |
| 15. ... Nimejikita kwenye nguvu za mteja wangu.                                                                                           | <input type="radio"/> | <input type="radio"/> | <input type="radio"/> | <input type="radio"/> | <input type="radio"/> |
| 16. ... Nimekuwa rafiki anayeaminika na mteja wangu.                                                                                      | <input type="radio"/> | <input type="radio"/> | <input type="radio"/> | <input type="radio"/> | <input type="radio"/> |
| 17. ... Sikumwambia mteja wangu nini anatakiwa afanye, lakini nilimsaidia katika kutafuta suluhisho yake                                  | <input type="radio"/> | <input type="radio"/> | <input type="radio"/> | <input type="radio"/> | <input type="radio"/> |
| 18. ... Nimejifunza pia na kufaidikia kutokana na vipindi vya uwezeshaji rika na mteja wangu.                                             | <input type="radio"/> | <input type="radio"/> | <input type="radio"/> | <input type="radio"/> | <input type="radio"/> |
| 19. ... Nimemsaidia mteja wangu kushiriki katika jamii.                                                                                   | <input type="radio"/> | <input type="radio"/> | <input type="radio"/> | <input type="radio"/> | <input type="radio"/> |
| 20. ... Nimemsaidia mteja wangu kuona na kutumia fursa mpya.                                                                              | <input type="radio"/> | <input type="radio"/> | <input type="radio"/> | <input type="radio"/> | <input type="radio"/> |
| 21. ... Nimemuelewa mteja wangu na hali aliyokuwa nayo.                                                                                   | <input type="radio"/> | <input type="radio"/> | <input type="radio"/> | <input type="radio"/> | <input type="radio"/> |

## UFS-S (service user version) - Hebrew

| מאוד                  | במידה ניכרת           | במידה מסויימת         | קצת                   | בכלל לא               |                                                                                                         |
|-----------------------|-----------------------|-----------------------|-----------------------|-----------------------|---------------------------------------------------------------------------------------------------------|
| <input type="radio"/> | <input type="radio"/> | <input type="radio"/> | <input type="radio"/> | <input type="radio"/> | 1. היה קל להשתתף במפגש תמיכת העמיתים של UPSIDES באופן קבוע (נסיעות, קביעת מפגשים וכו').                 |
| <input type="radio"/> | <input type="radio"/> | <input type="radio"/> | <input type="radio"/> | <input type="radio"/> | 2. הכמות והמשך של מפגשי תמיכת העמיתים של UPSIDES היו מתאימים.                                           |
| <input type="radio"/> | <input type="radio"/> | <input type="radio"/> | <input type="radio"/> | <input type="radio"/> | 3. הייתה אפשרות ליצור קשר עם עובד תמיכת העמיתים שלי מטעם UPSIDES בקלות בעת הצורך.                       |
| <input type="radio"/> | <input type="radio"/> | <input type="radio"/> | <input type="radio"/> | <input type="radio"/> | 4. השתתפתי באופן פעיל במפגשי תמיכת העמיתים של UPSIDES.                                                  |
| <input type="radio"/> | <input type="radio"/> | <input type="radio"/> | <input type="radio"/> | <input type="radio"/> | 5. לא היו לי שום בעיות להבין במה תמיכת העמיתים של UPSIDES עוסקת.                                        |
| <input type="radio"/> | <input type="radio"/> | <input type="radio"/> | <input type="radio"/> | <input type="radio"/> | 6. עובד תמיכת העמיתים שלי מטעם UPSIDES היה רגיש לשאלות ולהערות שלי.                                     |
| <input type="radio"/> | <input type="radio"/> | <input type="radio"/> | <input type="radio"/> | <input type="radio"/> | 7. עובד תמיכת העמיתים שלי מטעם UPSIDES לקח את הזמן בכדי להקשיב לי.                                      |
| <input type="radio"/> | <input type="radio"/> | <input type="radio"/> | <input type="radio"/> | <input type="radio"/> | 8. עובד תמיכת העמיתים שלי מטעם UPSIDES סיפק תמיכה חברתית שחשובה לי.                                     |
| <input type="radio"/> | <input type="radio"/> | <input type="radio"/> | <input type="radio"/> | <input type="radio"/> | 9. עובד תמיכת העמיתים שלי מטעם UPSIDES הראה לי כמה כישורים שיכולתי להעביר לחיי היום יום שלי.            |
| <input type="radio"/> | <input type="radio"/> | <input type="radio"/> | <input type="radio"/> | <input type="radio"/> | 10. עובד תמיכת העמיתים שלי מטעם UPSIDES העניק לי רעיונות ופרספקטיבות חדשות שיישאר חשובות עבורי בעתיד.   |
| <input type="radio"/> | <input type="radio"/> | <input type="radio"/> | <input type="radio"/> | <input type="radio"/> | 11. עובד תמיכת העמיתים שלי מטעם UPSIDES תמיד היה מוכן היטב לפגישות שלנו.                                |
| <input type="radio"/> | <input type="radio"/> | <input type="radio"/> | <input type="radio"/> | <input type="radio"/> | 12. עובד תמיכת העמיתים שלי מטעם UPSIDES היה מתאים / בחירה טובה לתפקיד הזה.                              |
| <input type="radio"/> | <input type="radio"/> | <input type="radio"/> | <input type="radio"/> | <input type="radio"/> | 13. עובד תמיכת העמיתים שלי מטעם UPSIDES הוכשר היטב לתפקיד הזה.                                          |
| <input type="radio"/> | <input type="radio"/> | <input type="radio"/> | <input type="radio"/> | <input type="radio"/> | 14. התנהגותו של עובד תמיכת העמיתים שלי מטעם UPSIDES הייתה תמיד מותאמת ומקצועית.                         |
| <input type="radio"/> | <input type="radio"/> | <input type="radio"/> | <input type="radio"/> | <input type="radio"/> | 15. הרווחה האישית של עובד תמיכת העמיתים שלי מטעם UPSIDES הייתה תמיד מספיק טובה בכדי להעניק תמיכה עבורי. |
| <input type="radio"/> | <input type="radio"/> | <input type="radio"/> | <input type="radio"/> | <input type="radio"/> | 16. לעובד תמיכת העמיתים שלי מטעם UPSIDES היו מערכות יחסים טובות עם שאר חברי הצוות הקליני.               |
|                       |                       |                       |                       |                       | עובד תמיכת עמיתים שלי מטעם UPSIDES:                                                                     |
| <input type="radio"/> | <input type="radio"/> | <input type="radio"/> | <input type="radio"/> | <input type="radio"/> | 17. ...שימש כמודל חיקוי וקידם תקווה.                                                                    |
| <input type="radio"/> | <input type="radio"/> | <input type="radio"/> | <input type="radio"/> | <input type="radio"/> | 18. ...העצים אותי לצמוח בתוך ומעבר למצבי הנפשי העכשווי.                                                 |
| <input type="radio"/> | <input type="radio"/> | <input type="radio"/> | <input type="radio"/> | <input type="radio"/> | 19. ...תמך בי בהחזרת השליטה על חיי.                                                                     |
| <input type="radio"/> | <input type="radio"/> | <input type="radio"/> | <input type="radio"/> | <input type="radio"/> | 20. ...עזר לי להפחית את הבידוד שלי.                                                                     |
| <input type="radio"/> | <input type="radio"/> | <input type="radio"/> | <input type="radio"/> | <input type="radio"/> | 21. ... עזר לי לתקשר עם המשפחה שלי ו/או צוות בריאות הנפש על הפרספקטיבה שלי ובחירות הטיפול שלי.          |
| <input type="radio"/> | <input type="radio"/> | <input type="radio"/> | <input type="radio"/> | <input type="radio"/> | 22. ...התמקד בחוזקות שלי.                                                                               |
| <input type="radio"/> | <input type="radio"/> | <input type="radio"/> | <input type="radio"/> | <input type="radio"/> | 23. ... הפך לבן לוויה שאני בוטח/ת בו.                                                                   |
| <input type="radio"/> | <input type="radio"/> | <input type="radio"/> | <input type="radio"/> | <input type="radio"/> | 24. ... לא אמר לי מה לעשות, אלא תמך בי במציאת פתרונות משלי.                                             |
| <input type="radio"/> | <input type="radio"/> | <input type="radio"/> | <input type="radio"/> | <input type="radio"/> | 25. ... ואני – למדנו שנינו והרווחנו ממפגשי תמיכת העמיתים.                                               |
| <input type="radio"/> | <input type="radio"/> | <input type="radio"/> | <input type="radio"/> | <input type="radio"/> | 26. ... עזר לי להשתתף בקהילה שלי.                                                                       |
| <input type="radio"/> | <input type="radio"/> | <input type="radio"/> | <input type="radio"/> | <input type="radio"/> | 27. ... עזר לי לראות ולהשתמש בהזדמנויות חדשות.                                                          |
| <input type="radio"/> | <input type="radio"/> | <input type="radio"/> | <input type="radio"/> | <input type="radio"/> | 28. ... הבין אותי ואת המצב שבו אני נמצא.                                                                |

## UFP-P (peer support worker version) – Hebrew

| מאוד                  | במידה ניכרת           | במידה מסויימת         | קצת                   | בכלל לא               |                                                                                                                  |
|-----------------------|-----------------------|-----------------------|-----------------------|-----------------------|------------------------------------------------------------------------------------------------------------------|
| <input type="radio"/> | <input type="radio"/> | <input type="radio"/> | <input type="radio"/> | <input type="radio"/> | 1. היה קל לספק פגישות באופן סדיר (נסיעות, קביעת מפגשים, וכו').                                                   |
| <input type="radio"/> | <input type="radio"/> | <input type="radio"/> | <input type="radio"/> | <input type="radio"/> | 2. מקבל השירות שלי היה שבע רצון מכמות המפגשים וממשך התמיכה שיכולתי לספק לו ב- UPSIDES.                           |
| <input type="radio"/> | <input type="radio"/> | <input type="radio"/> | <input type="radio"/> | <input type="radio"/> | 3. מקבל השירות יכל ליצור עימי קשר בקלות בעת הצורך.                                                               |
| <input type="radio"/> | <input type="radio"/> | <input type="radio"/> | <input type="radio"/> | <input type="radio"/> | 4. תמיד הייתי מוכן היטב לפגישות עם מקבל השירות שלי.                                                              |
| <input type="radio"/> | <input type="radio"/> | <input type="radio"/> | <input type="radio"/> | <input type="radio"/> | 5. הרגשתי שקיבלתי הכשרה טובה לעבודה זו.                                                                          |
| <input type="radio"/> | <input type="radio"/> | <input type="radio"/> | <input type="radio"/> | <input type="radio"/> | 6. הרווחה האישית שלי הייתה תמיד מספקת בכדי לספק תמיכת עמיתים למקבל השירות שלי.                                   |
| <input type="radio"/> | <input type="radio"/> | <input type="radio"/> | <input type="radio"/> | <input type="radio"/> | 7. הייתה לי מערכת יחסים טובה עם שאר חברי הצוות הקליני.                                                           |
| <input type="radio"/> | <input type="radio"/> | <input type="radio"/> | <input type="radio"/> | <input type="radio"/> | 8. חברי צוות בריאות הנפש האחרים יצרו עימי אינטראקציה במהלך העבודה כעובד תמיכת עמיתים.                            |
| <input type="radio"/> | <input type="radio"/> | <input type="radio"/> | <input type="radio"/> | <input type="radio"/> | 9. חברי צוות בריאות הנפש האחרים יצרו עימי אינטראקציה במהלך העבודה כעובד תמיכת עמיתים                             |
| <input type="radio"/> | <input type="radio"/> | <input type="radio"/> | <input type="radio"/> | <input type="radio"/> | 10. כעובד תמיכת עמיתים מטעם UPSIDES:                                                                             |
| <input type="radio"/> | <input type="radio"/> | <input type="radio"/> | <input type="radio"/> | <input type="radio"/> | 11. ...היוויותי מודל חיקוי וקידמתי תקווה.                                                                        |
| <input type="radio"/> | <input type="radio"/> | <input type="radio"/> | <input type="radio"/> | <input type="radio"/> | 12. ...העצמתי את מקבל השירות לגדול בתוך ומעבר למצב הנפשי העכשווי.                                                |
| <input type="radio"/> | <input type="radio"/> | <input type="radio"/> | <input type="radio"/> | <input type="radio"/> | 13. ...אפשרתי למקבל השירות שלי להשיג שליטה מחודשת על חייו.                                                       |
| <input type="radio"/> | <input type="radio"/> | <input type="radio"/> | <input type="radio"/> | <input type="radio"/> | 14. ...עזרתי למקבל השירות שלי להפחית את הבדידות שלו.                                                             |
| <input type="radio"/> | <input type="radio"/> | <input type="radio"/> | <input type="radio"/> | <input type="radio"/> | 15. ...סייעתי למקבל השירות שלי לתקשר עם המשפחה שלו / או צוות בריאות הנפש לגבי הפרספקטיבה שלו ובחירות הטיפול שלו. |
| <input type="radio"/> | <input type="radio"/> | <input type="radio"/> | <input type="radio"/> | <input type="radio"/> | 16. ...התמקדתי בחוזקות של מקבל השירות שלי.                                                                       |
| <input type="radio"/> | <input type="radio"/> | <input type="radio"/> | <input type="radio"/> | <input type="radio"/> | 17. ...הפכתי לבן לוויה שבוטחים בו – עבור מקבל השירות שלי...                                                      |
| <input type="radio"/> | <input type="radio"/> | <input type="radio"/> | <input type="radio"/> | <input type="radio"/> | 18. ...לא אמרתי למקבל השירות שלי מה לעשות, אלא תמכתי בו למצוא את הפתרונות שלו.                                   |
| <input type="radio"/> | <input type="radio"/> | <input type="radio"/> | <input type="radio"/> | <input type="radio"/> | 19. ...אני גם למדתי והרווחתי ממפגשי תמיכת העמיתים עם מקבל השירות שלי.                                            |
| <input type="radio"/> | <input type="radio"/> | <input type="radio"/> | <input type="radio"/> | <input type="radio"/> | 20. ...עזרתי למקבל השירות להשתתף בקהילה.                                                                         |
| <input type="radio"/> | <input type="radio"/> | <input type="radio"/> | <input type="radio"/> | <input type="radio"/> | 21. ...עזרתי למקבל השירות שלי להבחין ולהשתמש בהזדמנויות חדשות.                                                   |
| <input type="radio"/> | <input type="radio"/> | <input type="radio"/> | <input type="radio"/> | <input type="radio"/> | 22. ...הבנתי את מקבל השירות שלי ואת המצב שבו הוא נמצא.                                                           |

**UFS-S (service user version) - Gujarati**

|                                                                                                                                   | જરાય નહીં             | થોડુંક                | કંઈક અંશે             | તદ્દન થોડીક           | પૂર્ણ                 |
|-----------------------------------------------------------------------------------------------------------------------------------|-----------------------|-----------------------|-----------------------|-----------------------|-----------------------|
| 1. નિયમિત ધોરણે UPSIDES પીઅર સપોર્ટ સેશન્સમાં ભાગ લેવાનું સરળ હતું (મુસાફરી, સેશન્સનું ટાઇમટેબલ, વગેરે).                          | <input type="radio"/> | <input type="radio"/> | <input type="radio"/> | <input type="radio"/> | <input type="radio"/> |
| 2. UPSIDES પીઅર સપોર્ટની રકમ અને અવધિ યોગ્ય હતી.                                                                                  | <input type="radio"/> | <input type="radio"/> | <input type="radio"/> | <input type="radio"/> | <input type="radio"/> |
| 3. જ્યારે જરૂરી હોય ત્યારે મારા UPSIDES પીઅર સપોર્ટ વોલેન્ટિયરનો સંપર્ક કરવો શક્ય હતું..                                          | <input type="radio"/> | <input type="radio"/> | <input type="radio"/> | <input type="radio"/> | <input type="radio"/> |
| 4. મેં UPSIDES પીઅર સપોર્ટ સેશન્સમાં સક્રિયપણે ભાગ લીધો છે.                                                                       | <input type="radio"/> | <input type="radio"/> | <input type="radio"/> | <input type="radio"/> | <input type="radio"/> |
| 5. UPSIDES પીઅર સપોર્ટ શું છે તે સમજવામાં મને કોઈ સમસ્યા નહોતી.                                                                   | <input type="radio"/> | <input type="radio"/> | <input type="radio"/> | <input type="radio"/> | <input type="radio"/> |
| 6. મારા UPSIDES પીઅર સપોર્ટ વોલેન્ટિયર મારા પ્રશ્નો અને ટિપ્પણીઓ પ્રત્યે સંવેદનશીલ હતા.                                           | <input type="radio"/> | <input type="radio"/> | <input type="radio"/> | <input type="radio"/> | <input type="radio"/> |
| 7. મારા UPSIDES પીઅર સપોર્ટ વોલેન્ટિયરે મને સાંભળવામાં સમય લીધો.                                                                  | <input type="radio"/> | <input type="radio"/> | <input type="radio"/> | <input type="radio"/> | <input type="radio"/> |
| 8. મારા UPSIDES પીઅર સપોર્ટ વોલેન્ટિયરે મારા માટે મહત્વપૂર્ણ સામાજિક સપોર્ટ આપ્યો.                                                | <input type="radio"/> | <input type="radio"/> | <input type="radio"/> | <input type="radio"/> | <input type="radio"/> |
| 9. મારા UPSIDES પીઅર સપોર્ટ વોલેન્ટિયરે મને કેટલીક કુશળતા બતાવી કે જે હું મારા દૈનિક જીવનમાં સ્થાનાંતરિત કરવામાં સક્ષમ રહું છું.  | <input type="radio"/> | <input type="radio"/> | <input type="radio"/> | <input type="radio"/> | <input type="radio"/> |
| 10. મારા UPSIDES પીઅર સપોર્ટ વોલેન્ટિયરે મને નવા વિચારો અને દ્રષ્ટિકોણ આપ્યા જે ભવિષ્યમાં મારા માટે મહત્વપૂર્ણ રહેશે.             | <input type="radio"/> | <input type="radio"/> | <input type="radio"/> | <input type="radio"/> | <input type="radio"/> |
| 11. મારા UPSIDES પીઅર સપોર્ટ કાર્યકર હંમેશાં અમારી મીટિંગ્સ માટે સારી રીતે તૈયાર રહે છે.                                          | <input type="radio"/> | <input type="radio"/> | <input type="radio"/> | <input type="radio"/> | <input type="radio"/> |
| 12. મારા UPSIDES પીઅર સપોર્ટ કાર્યકર યોગ્ય હતા. / આ નોકરી માટે સારી પસંદગી                                                        | <input type="radio"/> | <input type="radio"/> | <input type="radio"/> | <input type="radio"/> | <input type="radio"/> |
| 13. મારા UPSIDES પીઅર સપોર્ટ કાર્યકરને આ નોકરી માટે સારી રીતે તાલીમ આપવામાં આવી હતી.                                              | <input type="radio"/> | <input type="radio"/> | <input type="radio"/> | <input type="radio"/> | <input type="radio"/> |
| 14. મારા UPSIDES પીઅર સપોર્ટ કાર્યકરનું વર્તન હંમેશાં યોગ્ય અને વ્યવસાયિક હતું.                                                   | <input type="radio"/> | <input type="radio"/> | <input type="radio"/> | <input type="radio"/> | <input type="radio"/> |
| 15. મારું UPSIDES પીઅર સપોર્ટ વોલેન્ટિયરની સુખાકારી હંમેશાં મને સપોર્ટ પૂરો પાડવા માટે પૂરતી હતી.                                 | <input type="radio"/> | <input type="radio"/> | <input type="radio"/> | <input type="radio"/> | <input type="radio"/> |
| 16. મારા UPSIDES પીઅર સપોર્ટ વોલેન્ટિયરના અન્ય ક્લિનિકલ સ્ટાફ સભ્યો સાથે સારા સંબંધો હતા.                                         | <input type="radio"/> | <input type="radio"/> | <input type="radio"/> | <input type="radio"/> | <input type="radio"/> |
| મારા યુપીએસઇડ્સ પીઅર સપોર્ટ વોલેન્ટિયર...(PSV)                                                                                    | જરાય નહીં             | થોડુંક                | કંઈક અંશે             | તદ્દન થોડીક           | પૂર્ણ                 |
| 17. ... રોલ મોડેલ તરીકે સેવા આપી અને આશાને પ્રોત્સાહન આપ્યું.                                                                     | <input type="radio"/> | <input type="radio"/> | <input type="radio"/> | <input type="radio"/> | <input type="radio"/> |
| 18. ... મારી વર્તમાન માનસિક સ્વાસ્થ્યની સ્થિતિની અંદર અને તેનાથી આગળ વધવા માટે મને શક્તિ આપી.                                     | <input type="radio"/> | <input type="radio"/> | <input type="radio"/> | <input type="radio"/> | <input type="radio"/> |
| 19. ... મારા જીવન ઉપર નિયંત્રણ મેળવવા માટે મને સમર્થન આપ્યું.                                                                     | <input type="radio"/> | <input type="radio"/> | <input type="radio"/> | <input type="radio"/> | <input type="radio"/> |
| 20. ... મારી અલગતા ઘટાડવામાં મદદ કરી.                                                                                             | <input type="radio"/> | <input type="radio"/> | <input type="radio"/> | <input type="radio"/> | <input type="radio"/> |
| 21. ... મારા પરિપ્રેક્ષ્ય અને મારી સારવાર પસંદગીઓ વિશે મારા કુટુંબ અને / અથવા મેન્ટલ હેલ્થ સ્ટાફ સાથે વાતચીત કરવામાં મને મદદ કરી. | <input type="radio"/> | <input type="radio"/> | <input type="radio"/> | <input type="radio"/> | <input type="radio"/> |
| 22. ... મારી શક્તિ પર ધ્યાન કેન્દ્રિત કર્યું છે.                                                                                  | <input type="radio"/> | <input type="radio"/> | <input type="radio"/> | <input type="radio"/> | <input type="radio"/> |
| 23. ... એક વિશ્વસનીય સાથી બની ગયો છે.                                                                                             | <input type="radio"/> | <input type="radio"/> | <input type="radio"/> | <input type="radio"/> | <input type="radio"/> |
| 24. ... મને શું કરવું તે કહ્યું નહીં, પણ મારા પોતાના ઉકેલો શોધવા માટે મને ટેકો આપ્યો.                                             | <input type="radio"/> | <input type="radio"/> | <input type="radio"/> | <input type="radio"/> | <input type="radio"/> |
| 25. ... અને હું અમારા પીઅર સપોર્ટ સેશન્સથી બંને શીખી અને લાભ મેળવી શકું છું.                                                      | <input type="radio"/> | <input type="radio"/> | <input type="radio"/> | <input type="radio"/> | <input type="radio"/> |
| 26. ... મારા સમુદાયમાં ભાગ લેવામાં મને મદદ કરી છે.                                                                                | <input type="radio"/> | <input type="radio"/> | <input type="radio"/> | <input type="radio"/> | <input type="radio"/> |
| 27. ... નવી તકી જોવા અને વાપરવામાં મને મદદ કરી                                                                                    | <input type="radio"/> | <input type="radio"/> | <input type="radio"/> | <input type="radio"/> | <input type="radio"/> |
| 28. ... મને સમજ્યો અને હું જે પરિસ્થિતિમાં છું.                                                                                   | <input type="radio"/> | <input type="radio"/> | <input type="radio"/> | <input type="radio"/> | <input type="radio"/> |

## UFP-P (peer support worker version) - Gujarati

|                                                                                                                                              | જરાય નહિ              | થોડુંક                | કંઈક અંશે             | તદન થોડીક             | ખૂબ ખૂબ               |
|----------------------------------------------------------------------------------------------------------------------------------------------|-----------------------|-----------------------|-----------------------|-----------------------|-----------------------|
| 1. નિયમિત ધોરણે UPSIDES પીઅર સપોર્ટ સેશન્સ પૂરા પાડવા એ સરળ હતું. (મુસાફરી, સેશન્સ નું સમય પત્રક વગેરે)                                      | <input type="radio"/> | <input type="radio"/> | <input type="radio"/> | <input type="radio"/> | <input type="radio"/> |
| 2. મારા દર્દી સત્રનીરકમ અને સપોર્ટ ના સમયગાળાથી સંતુષ્ટ હતા કે જેહું તેમને UPSIDES માં પ્રદાન કરી શકું.                                      | <input type="radio"/> | <input type="radio"/> | <input type="radio"/> | <input type="radio"/> | <input type="radio"/> |
| 3. જ્યારે જરૂરી હોય ત્યારે દર્દી એ મારો સંપર્ક કરવો શક્ય હતો.                                                                                | <input type="radio"/> | <input type="radio"/> | <input type="radio"/> | <input type="radio"/> | <input type="radio"/> |
| 4. હું હંમેશાં મારા દર્દી સાથે ની મીટિંગ્સ માટે સારી રીતે તૈયાર હતો.                                                                         | <input type="radio"/> | <input type="radio"/> | <input type="radio"/> | <input type="radio"/> | <input type="radio"/> |
| 5. મને લાગ્યું કે હું આ કામ માટે સારી રીતે પ્રશિક્ષિત (ટ્રેઇન્ડ) છું.                                                                        | <input type="radio"/> | <input type="radio"/> | <input type="radio"/> | <input type="radio"/> | <input type="radio"/> |
| 6. મારી પોતાની સુખાકારી હંમેશાં મારા દર્દીને પીઅર સપોર્ટ પૂરા પાડવા માટે પૂરતી હતી.                                                          | <input type="radio"/> | <input type="radio"/> | <input type="radio"/> | <input type="radio"/> | <input type="radio"/> |
| 7. મારા અન્ય ક્લિનિકલ સ્ટાફ સભ્યો સાથે સારા સંબંધો હતા                                                                                       | <input type="radio"/> | <input type="radio"/> | <input type="radio"/> | <input type="radio"/> | <input type="radio"/> |
| 8. અન્ય માનસિક આરોગ્ય કર્મચારી ઓ PSV તરીકે ના મારા કાર્ય દરમિયાન મારી સાથે સંકળાયેલા છે.                                                     | <input type="radio"/> | <input type="radio"/> | <input type="radio"/> | <input type="radio"/> | <input type="radio"/> |
| 9. અન્ય માનસિક આરોગ્ય કર્મચારીઓ એમને મ્યુચ્યુઅલ દર્દીઓ વિશેના મારામત / સલાહ માટે પૂછ્યું.                                                    | <input type="radio"/> | <input type="radio"/> | <input type="radio"/> | <input type="radio"/> | <input type="radio"/> |
| UPSIDES પીઅર સપોર્ટ વોલેંટિયર તરીકે...                                                                                                       |                       |                       |                       |                       |                       |
|                                                                                                                                              | જરાય નહિ              | થોડુંક                | કંઈક અંશે             | તદન થોડીક             | ખૂબ ખૂબ               |
| 10. મેં રોલ મોડેલ તરીકે કામ કર્યું છે અને આશા ને પ્રોત્સાહન આપ્યું છે.                                                                       | <input type="radio"/> | <input type="radio"/> | <input type="radio"/> | <input type="radio"/> | <input type="radio"/> |
| 11. મેં મારા દર્દી ને તેમની વર્તમાન માનસિક સ્વાસ્થ્યની સ્થિતિની અંદર અને આગળ વધવા માટે શક્તિ આપી છે.                                         | <input type="radio"/> | <input type="radio"/> | <input type="radio"/> | <input type="radio"/> | <input type="radio"/> |
| 12. મે મારા દર્દી ને તેમના જીવન ઉપર ફરીથી નિયંત્રણ મેળવવા માટે સક્ષમ બનાવ્યા છે.                                                             | <input type="radio"/> | <input type="radio"/> | <input type="radio"/> | <input type="radio"/> | <input type="radio"/> |
| 13. મેં મારા દર્દી ને તેમના અલગતાને ઘટાડવા માં મદદ કરી છે.                                                                                   | <input type="radio"/> | <input type="radio"/> | <input type="radio"/> | <input type="radio"/> | <input type="radio"/> |
| 14. મેં મારા દર્દી ને તેમના કુટુંબ અને / અથવા મેન્ટલ હેલ્થ સ્ટાફ સાથે તેમના પરિપ્રેક્ષ્ય અને સારવારની પસંદગી વિશે વાતચીત કરવામાં મદદ કરી છે. | <input type="radio"/> | <input type="radio"/> | <input type="radio"/> | <input type="radio"/> | <input type="radio"/> |
| 15. મેં મારા દર્દી ની શક્તિઓ પર ધ્યાન કેન્દ્રિત કર્યું છે                                                                                    | <input type="radio"/> | <input type="radio"/> | <input type="radio"/> | <input type="radio"/> | <input type="radio"/> |
| 16. હું મારા દર્દી નો વિશ્વસનીય સાથી બની ગયો છું                                                                                             | <input type="radio"/> | <input type="radio"/> | <input type="radio"/> | <input type="radio"/> | <input type="radio"/> |
| 17. મેં મારા દર્દી ને શું કરવું તે કહ્યું નથી, પરંતુ તેમના પોતાના ઉકેલો શોધવા માટે તેમને ટેકો આપ્યો.                                         | <input type="radio"/> | <input type="radio"/> | <input type="radio"/> | <input type="radio"/> | <input type="radio"/> |
| 18. મેં મારા દર્દી સાથેના પીઅર સપોર્ટ સેશન્સથી પણ શીખ્યો અને તેનો ફાયદો મેળવ્યો                                                              | <input type="radio"/> | <input type="radio"/> | <input type="radio"/> | <input type="radio"/> | <input type="radio"/> |
| 19. મારા દર્દી ને સમુદાયમાં ભાગલેવામાં મદદ કરી છે.                                                                                           | <input type="radio"/> | <input type="radio"/> | <input type="radio"/> | <input type="radio"/> | <input type="radio"/> |
| 20. નવી તકો જોવા અને તેનો ઉપયોગ કરવામાં મારા દર્દી ને મદદ કરી.                                                                               | <input type="radio"/> | <input type="radio"/> | <input type="radio"/> | <input type="radio"/> | <input type="radio"/> |
| 21. હું મારા દર્દી અને તે જે પરિસ્થિતિ માં છે તે સમજી શક્યો છું.                                                                             | <input type="radio"/> | <input type="radio"/> | <input type="radio"/> | <input type="radio"/> | <input type="radio"/> |
