# Supplementary material for: Measuring fidelity to manualised peer support for people with severe mental health conditions: development and psychometric evaluation of the UPSIDES fidelity scale
Source: PubMed Central journal article supplement (PMC11468091; doi:10.1186/s12888-024-06081-8), 2024-10-11
Supplement: 12888_2024_6081_MOESM3_ESM.pdf [file 12888_2024_6081_MOESM3_ESM.pdf]

**Additional file 3 – Internal Consistency**

|                                | Items SU fidelity scale                                                                                                      | Item-Total Correlation | $\alpha$ if item deleted |
|--------------------------------|------------------------------------------------------------------------------------------------------------------------------|------------------------|--------------------------|
|                                | N = 244; alpha total = <b>.711</b>                                                                                           |                        |                          |
| receipt                        | 1: It was easy to participate in UPSIDES peer support sessions on a regular basis (Traveling, scheduling of sessions, etc.). | .575                   | .561                     |
|                                | 2: The amount and duration of UPSIDES peer support was appropriate.                                                          | .530                   | .626                     |
|                                | 3: It was possible to contact my UPSIDES peer support worker easily when needed.                                             | .492                   | .669                     |
|                                | N = 243, alpha total = <b>.778</b>                                                                                           |                        |                          |
| engagement                     | 4: I have actively participated in UPSIDES peer support sessions.                                                            | .564                   | .735                     |
|                                | 5: I had no problems understanding what UPSIDES peer support is about.                                                       | .571                   | .741                     |
|                                | 6: My UPSIDES peer support worker was sensitive to my questions and comments.                                                | .562                   | .738                     |
|                                | 7: My UPSIDES peer support worker took time to listen to me.                                                                 | .671                   | .687                     |
|                                | N = 243, alpha total = <b>.852</b>                                                                                           |                        |                          |
| enactment                      | 8: My UPSIDES peer support worker provided social support important to me.                                                   | .645                   | .863                     |
|                                | 9: My UPSIDES peer support worker showed me some skills that I have been able to transfer into my daily life.                | .765                   | .753                     |
|                                | 10: My UPSIDES peer support worker gave me new ideas and perspectives which will remain important to me in the future.       | .766                   | .753                     |
|                                | N = 233; alpha total = <b>.922</b>                                                                                           |                        |                          |
| competence and professionalism | 11: My UPSIDES peer support worker was always well-prepared for our meetings.                                                | .796                   | .905                     |
|                                | 12: My UPSIDES peer support worker was suitable / a good choice for this job.                                                | .847                   | .897                     |
|                                | 13: My UPSIDES peer support worker was well-trained for this job.                                                            | .822                   | .901                     |
|                                | 14: My UPSIDES peer support worker's behaviour was always appropriate and professional.                                      | .752                   | .910                     |
|                                | 15: My UPSIDES peer support worker's wellbeing was always well enough to provide support to me.                              | .745                   | .911                     |
|                                | 16: My UPSIDES peer support worker had good relationships with other clinical staff members.                                 | .698                   | .919                     |
|                                | N = 242; alpha total = <b>.954</b>                                                                                           |                        |                          |
| active ingredients             | 17: ... served as a role model and promoted hope.                                                                            | .796                   | .950                     |
|                                | 18: ... empowered me to grow within and beyond my current mental health status.                                              | .828                   | .949                     |
|                                | 19: ... supported me to regain control over my life.                                                                         | .810                   | .949                     |
|                                | 20: ... helped me to reduce my isolation.                                                                                    | .714                   | .952                     |
|                                | 21: ... helped me to communicate with my family and/or MH staff about my perspective and my treatment choices                | .672                   | .954                     |
|                                | 22: ... has focussed on my strengths.                                                                                        | .795                   | .950                     |
|                                | 23: ... has become a trusted companion.                                                                                      | .783                   | .950                     |
|                                | 24: ... did not tell me what to do, but supported me to find my own solutions.                                               | .770                   | .950                     |
|                                | 25: ... and I have both learned and benefitted from our peer support sessions.                                               | .832                   | .949                     |
|                                | 26: ... has helped me to take part in my community.                                                                          | .800                   | .950                     |
|                                | 27: ... helped me to see and use new opportunities                                                                           | .764                   | .951                     |
|                                | 28: ... understood me and the situation I am in.                                                                             | .802                   | .950                     |

| Items PSW fidelity scale                                       |                                                                                                                                     | Item-Total Correlation | $\alpha$ if item deleted |
|----------------------------------------------------------------|-------------------------------------------------------------------------------------------------------------------------------------|------------------------|--------------------------|
| N = 235; total alpha = <b>.736</b>                             |                                                                                                                                     |                        |                          |
| receipt                                                        | 1: It was easy to provide UPSIDES peer support sessions on a regular basis. (Traveling, scheduling of sessions, etc.)               | .607                   | .593                     |
|                                                                | 2: My client was satisfied with the amount of sessions and duration of support I could provide in UPSIDES.                          | .582                   | .632                     |
|                                                                | 3: It was possible for my client to contact me easily when needed.                                                                  | .501                   | .720                     |
| N = 237; total alpha = <b>.739</b>                             |                                                                                                                                     |                        |                          |
| competence                                                     | 4: I was always well-prepared for the meetings with my client.                                                                      | .617                   | .590                     |
|                                                                | 5: I felt that I was well-trained for this job.                                                                                     | .523                   | .702                     |
|                                                                | 6: My own wellbeing was always enough to provide peer support to my client.                                                         | .554                   | .666                     |
| N = 232; total alpha = <b>.674</b>                             |                                                                                                                                     |                        |                          |
| communication                                                  | 7: I had good relationships with other clinical staff members.                                                                      | .550                   | .522                     |
|                                                                | 8: Other mental health staff engaged with me during my work as PSW.                                                                 | .509                   | .549                     |
|                                                                | 9: Other mental health staff asked me for my point of view/ advice about our mutual client.                                         | .425                   | .677                     |
| N = 231; total alpha = <b>.920</b>                             |                                                                                                                                     |                        |                          |
| active ingredients                                             | 10: ... I have served as a role model and promoted hope.                                                                            | .666                   | .914                     |
|                                                                | 11: ... I have empowered my client to grow within and beyond his*her current mental health status.                                  | .703                   | .912                     |
|                                                                | 12: ... I have enabled my client to regain control over his*her life.                                                               | .760                   | .909                     |
|                                                                | 13: ... I have helped my client to reduce his*her isolation.                                                                        | .726                   | .911                     |
|                                                                | 14: ... I have helped my client to communicate with his*her family and/or MH staff about his*her perspective and treatment choices. | .624                   | .916                     |
|                                                                | 15: ... I have focussed on the strengths of my client.                                                                              | .629                   | .915                     |
|                                                                | 16: ... I have become a trusted companion of my client.                                                                             | .709                   | .912                     |
|                                                                | 17: ... I did not tell my client what to do, but supported him*her to find his*her own solutions.                                   | .548                   | .918                     |
|                                                                | 18: ... I have also learned and benefitted from the peer support sessions with my client.                                           | .688                   | .913                     |
|                                                                | 19: ... I have helped my client to take part in the community.                                                                      | .655                   | .914                     |
|                                                                | 20: ... I helped my client to see and use new opportunities.                                                                        | .721                   | .911                     |
| 21: ... I understood my client and the situation he*she is in. | .629                                                                                                                                | .916                   |                          |
